# Supplementary material
Source: PubMed Central journal article supplement (PMC2770013)
Supplement: NIHMS141493-supplement-1_si_001.pdf [file NIHMS141493-supplement-1_si_001.pdf]

**Supporting Information for Moreau, Schubert, Nasr, Török, Miller, Kennedy, Kemp:**

“Context-Independent, Temperature-Dependent Helical Propensities for Amino Acid Residues.”

**I. Circular Dichroism Data**

A. Norleucine scan

| peptide 2                                                                                                                                      | - $[\theta]_{222}$ deg cm <sup>2</sup> dmol <sup>-1</sup> |       |      |
|------------------------------------------------------------------------------------------------------------------------------------------------|-----------------------------------------------------------|-------|------|
|                                                                                                                                                | 2°C                                                       | 25°C  | 60°C |
| WK <sub>4</sub> Inp <sub>2</sub> <sup>t</sup> LNleA <sub>18</sub> <sup>t</sup> LInp <sub>2</sub> K <sub>4</sub> NH <sub>2</sub>                | 27844                                                     | 18765 | 7750 |
| WK <sub>4</sub> Inp <sub>2</sub> <sup>t</sup> LANleA <sub>17</sub> <sup>t</sup> LInp <sub>2</sub> K <sub>4</sub> NH <sub>2</sub>               | 28975                                                     | 18341 | 7394 |
| WK <sub>4</sub> Inp <sub>2</sub> <sup>t</sup> LA <sub>2</sub> NleA <sub>16</sub> <sup>t</sup> LInp <sub>2</sub> K <sub>4</sub> NH <sub>2</sub> | 27579                                                     | 18217 | 7233 |
| WK <sub>4</sub> Inp <sub>2</sub> <sup>t</sup> LA <sub>3</sub> NleA <sub>15</sub> <sup>t</sup> LInp <sub>2</sub> K <sub>4</sub> NH <sub>2</sub> | 30339                                                     | 20298 | 8120 |
| WK <sub>4</sub> Inp <sub>2</sub> <sup>t</sup> LA <sub>5</sub> NleA <sub>13</sub> <sup>t</sup> LInp <sub>2</sub> K <sub>4</sub> NH <sub>2</sub> | 27816                                                     | 19068 | 7813 |
| WK <sub>4</sub> Inp <sub>2</sub> <sup>t</sup> LA <sub>7</sub> NleA <sub>11</sub> <sup>t</sup> LInp <sub>2</sub> K <sub>4</sub> NH <sub>2</sub> | 28620                                                     | 18815 | 7444 |
| WK <sub>4</sub> Inp <sub>2</sub> <sup>t</sup> LA <sub>9</sub> NleA <sub>9</sub> <sup>t</sup> LInp <sub>2</sub> K <sub>4</sub> NH <sub>2</sub>  | 28872                                                     | 18798 | 7728 |
| WK <sub>4</sub> Inp <sub>2</sub> <sup>t</sup> LA <sub>11</sub> NleA <sub>7</sub> <sup>t</sup> LInp <sub>2</sub> K <sub>4</sub> NH <sub>2</sub> | 28243                                                     | 18134 | 7322 |
| WK <sub>4</sub> Inp <sub>2</sub> <sup>t</sup> LA <sub>13</sub> NleA <sub>5</sub> <sup>t</sup> LInp <sub>2</sub> K <sub>4</sub> NH <sub>2</sub> | 28316                                                     | 18422 | 7357 |
| WK <sub>4</sub> Inp <sub>2</sub> <sup>t</sup> LA <sub>15</sub> NleA <sub>3</sub> <sup>t</sup> LInp <sub>2</sub> K <sub>4</sub> NH <sub>2</sub> | 28851                                                     | 18590 | 7627 |
| WK <sub>4</sub> Inp <sub>2</sub> <sup>t</sup> LA <sub>16</sub> NleA <sub>2</sub> <sup>t</sup> LInp <sub>2</sub> K <sub>4</sub> NH <sub>2</sub> | 27745                                                     | 17947 | 7405 |
| WK <sub>4</sub> Inp <sub>2</sub> <sup>t</sup> LA <sub>17</sub> NleA <sup>t</sup> LInp <sub>2</sub> K <sub>4</sub> NH <sub>2</sub>              | 27900                                                     | 18124 | 7598 |
| WK <sub>4</sub> Inp <sub>2</sub> <sup>t</sup> LA <sub>18</sub> Nle <sup>t</sup> LInp <sub>2</sub> K <sub>4</sub> NH <sub>2</sub>               | 29162                                                     | 19212 | 7728 |

B. Double Norleucine scan

|                                                                                                                                                                  | 2°C   | 25°C  | 60°C |
|------------------------------------------------------------------------------------------------------------------------------------------------------------------|-------|-------|------|
| WK <sub>4</sub> Inp <sub>2</sub> <sup>t</sup> LA <sub>9</sub> Nle <sub>2</sub> A <sub>8</sub> <sup>t</sup> LInp <sub>2</sub> K <sub>4</sub> NH <sub>2</sub>      | 28066 | 17309 | 7466 |
| WK <sub>4</sub> Inp <sub>2</sub> <sup>t</sup> LA <sub>8</sub> NleANleA <sub>8</sub> <sup>t</sup> LInp <sub>2</sub> K <sub>4</sub> NH <sub>2</sub>                | 27573 | 17264 | 7204 |
| WK <sub>4</sub> Inp <sub>2</sub> <sup>t</sup> LA <sub>8</sub> NleA <sub>2</sub> NleA <sub>7</sub> <sup>t</sup> LInp <sub>2</sub> K <sub>4</sub> NH <sub>2</sub>  | 26489 | 16843 | 7342 |
| WK <sub>4</sub> Inp <sub>2</sub> <sup>t</sup> LA <sub>7</sub> NleA <sub>3</sub> NleA <sub>7</sub> <sup>t</sup> LInp <sub>2</sub> K <sub>4</sub> NH <sub>2</sub>  | 29313 | 19404 | 8408 |
| WK <sub>4</sub> Inp <sub>2</sub> <sup>t</sup> LA <sub>6</sub> NleA <sub>4</sub> NleA <sub>7</sub> <sup>t</sup> LInp <sub>2</sub> K <sub>4</sub> NH <sub>2</sub>  | 28321 | 17664 | 7353 |
| WK <sub>4</sub> Inp <sub>2</sub> <sup>t</sup> LA <sub>5</sub> NleA <sub>7</sub> NleA <sub>5</sub> <sup>t</sup> LInp <sub>2</sub> K <sub>4</sub> NH <sub>2</sub>  | 28223 | 18262 | 7671 |
| WK <sub>4</sub> Inp <sub>2</sub> <sup>t</sup> LA <sub>2</sub> NleA <sub>13</sub> NleA <sub>2</sub> <sup>t</sup> LInp <sub>2</sub> K <sub>4</sub> NH <sub>2</sub> | 27398 | 18080 | 7725 |

C. Double Norvaline scan

|                                                                                                                                                                  | 2°C   | 25°C  | 60°C |
|------------------------------------------------------------------------------------------------------------------------------------------------------------------|-------|-------|------|
| WK <sub>4</sub> Inp <sub>2</sub> <sup>t</sup> LA <sub>9</sub> Nva <sub>2</sub> A <sub>8</sub> <sup>t</sup> LInp <sub>2</sub> K <sub>4</sub> NH <sub>2</sub>      | 26089 | 15519 | 6596 |
| WK <sub>4</sub> Inp <sub>2</sub> <sup>t</sup> LA <sub>8</sub> NvaANvaA <sub>8</sub> <sup>t</sup> LInp <sub>2</sub> K <sub>4</sub> NH <sub>2</sub>                | 26211 | 15650 | 6610 |
| WK <sub>4</sub> Inp <sub>2</sub> <sup>t</sup> LA <sub>8</sub> NvaA <sub>2</sub> NvaA <sub>7</sub> <sup>t</sup> LInp <sub>2</sub> K <sub>4</sub> NH <sub>2</sub>  | 24274 | 14660 | 6161 |
| WK <sub>4</sub> Inp <sub>2</sub> <sup>t</sup> LA <sub>7</sub> NvaA <sub>3</sub> NvaA <sub>7</sub> <sup>t</sup> LInp <sub>2</sub> K <sub>4</sub> NH <sub>2</sub>  | 27222 | 17311 | 7330 |
| WK <sub>4</sub> Inp <sub>2</sub> <sup>t</sup> LA <sub>6</sub> NvaA <sub>4</sub> NvaA <sub>7</sub> <sup>t</sup> LInp <sub>2</sub> K <sub>4</sub> NH <sub>2</sub>  | 26698 | 16166 | 6999 |
| WK <sub>4</sub> Inp <sub>2</sub> <sup>t</sup> LA <sub>5</sub> NvaA <sub>7</sub> NvaA <sub>5</sub> <sup>t</sup> LInp <sub>2</sub> K <sub>4</sub> NH <sub>2</sub>  | 27092 | 16638 | 7023 |
| WK <sub>4</sub> Inp <sub>2</sub> <sup>t</sup> LA <sub>2</sub> NvaA <sub>13</sub> NvaA <sub>2</sub> <sup>t</sup> LInp <sub>2</sub> K <sub>4</sub> NH <sub>2</sub> | 26442 | 16915 | 7171 |

D. Single and double Guests  $WK_4Inp_2^I LNleA_9XA_9^I LInp_2K_4NH_2$   $WK_4Inp_2^I LNleA_9X_2A_8^I LInp_2K_4NH_2$

$-[\theta]_{222} \text{ deg cm}^2 \text{ dmol}^{-1}$  Guest X

| Guest   | 2°C   | 25°C  | 60°C | double Guest         | 2°C   | 25°C  | 60°C |
|---------|-------|-------|------|----------------------|-------|-------|------|
| Pro     | 1346  | 2406  | 3236 |                      |       |       |      |
| Gly     | 12828 | 7127  | 4285 | GG                   | 3925  | 3568  | 3429 |
| Val     | 21366 | 12056 | 5719 | VV                   | 13509 | 7157  | 4419 |
| Phe     | 22617 | 12688 | 5288 | FF                   | 13438 | 7372  | 4048 |
| Ser-OMe | 23835 | 13322 | 5385 | (S-OMe) <sub>2</sub> | 17349 | 8590  | 4203 |
| Ile     | 24035 | 14578 | 6303 | II                   | 19289 | 10906 | 5681 |
| Met     | 24048 | 14855 | 6374 | MM                   | 20615 | 12601 | 5888 |
| Abu     | 26323 | 16123 | 6485 | Abu <sub>2</sub>     | 23103 | 13006 | 5486 |
| Leu     | 26162 | 16701 | 7073 | 7357                 | 24143 | 15092 | 6813 |
| Ala     | 27464 | 17757 | 6825 | 7627                 | 27464 | 15519 | 6825 |
| Nva     | 27791 | 17353 | 7247 | Nva <sub>2</sub>     | 27464 | 17757 | 6596 |
| Nle     | 28872 | 18798 | 7728 | Nle <sub>2</sub>     | 28066 | 17697 | 7466 |
| Asn     | 18993 | 10685 | 5302 | NN                   | 10252 | 6488  | 4622 |
| Ser     | 19920 | 10912 | 4726 | SS                   | 11317 | 6517  | 4710 |
| Thr     | 20549 | 11057 | 5551 | TT                   | 9513  | 4551  | 4386 |
| Tyr     | 20930 | 12220 | 5533 | YY                   | 11922 | 6979  | 3715 |
| Gln     | 23943 | 14152 | 6232 | QQ                   | 17266 | 10021 | 4760 |

E. Lysine pH 7, Arginine pH 7, Histidine pH 1.2

| peptide 2                                                                                                                                      | - $[\theta]_{222}$ deg cm <sup>2</sup> dmol <sup>-1</sup> |       |             |
|------------------------------------------------------------------------------------------------------------------------------------------------|-----------------------------------------------------------|-------|-------------|
|                                                                                                                                                | 2°C                                                       | 25°C  | 60°C        |
| WK <sub>4</sub> Inp <sub>2</sub> <sup>t</sup> LLysA <sub>18</sub> <sup>t</sup> LInp <sub>2</sub> K <sub>4</sub> NH <sub>2</sub>                | 24035                                                     | 14436 | 6123        |
| WK <sub>4</sub> Inp <sub>2</sub> <sup>t</sup> LALysA <sub>17</sub> <sup>t</sup> LInp <sub>2</sub> K <sub>4</sub> NH <sub>2</sub>               | 23168                                                     | 13484 | 6189        |
| WK <sub>4</sub> Inp <sub>2</sub> <sup>t</sup> LA <sub>2</sub> LysA <sub>16</sub> <sup>t</sup> LInp <sub>2</sub> K <sub>4</sub> NH <sub>2</sub> | 22857                                                     | 13453 | 5889        |
| WK <sub>4</sub> Inp <sub>2</sub> <sup>t</sup> LA <sub>3</sub> LysA <sub>15</sub> <sup>t</sup> LInp <sub>2</sub> K <sub>4</sub> NH <sub>2</sub> | 23532                                                     | 13375 | 5754        |
| WK <sub>4</sub> Inp <sub>2</sub> <sup>t</sup> LA <sub>9</sub> LysA <sub>9</sub> <sup>t</sup> LInp <sub>2</sub> K <sub>4</sub> NH <sub>2</sub>  | 25582                                                     | 14866 | 6154        |
| WK <sub>4</sub> Inp <sub>2</sub> <sup>t</sup> LA <sub>11</sub> LysA <sub>7</sub> <sup>t</sup> LInp <sub>2</sub> K <sub>4</sub> NH <sub>2</sub> | 24997                                                     | 14817 | 6566        |
| WK <sub>4</sub> Inp <sub>2</sub> <sup>t</sup> LA <sub>13</sub> LysA <sub>5</sub> <sup>t</sup> LInp <sub>2</sub> K <sub>4</sub> NH <sub>2</sub> | 26565                                                     | 16622 | 7198        |
| WK <sub>4</sub> Inp <sub>2</sub> <sup>t</sup> LA <sub>15</sub> LysA <sub>3</sub> <sup>t</sup> LInp <sub>2</sub> K <sub>4</sub> NH <sub>2</sub> | 27835                                                     | 18293 | 8021        |
| WK <sub>4</sub> Inp <sub>2</sub> <sup>t</sup> LA <sub>16</sub> LysA <sub>2</sub> <sup>t</sup> LInp <sub>2</sub> K <sub>4</sub> NH <sub>2</sub> | 27371                                                     | 18382 | 8043        |
| WK <sub>4</sub> Inp <sub>2</sub> <sup>t</sup> LA <sub>17</sub> NleA <sup>t</sup> LInp <sub>2</sub> K <sub>4</sub> NH <sub>2</sub>              | 28597                                                     | 19703 | 8678        |
| WK <sub>4</sub> Inp <sub>2</sub> <sup>t</sup> LA <sub>18</sub> Lys <sup>t</sup> LInp <sub>2</sub> K <sub>4</sub> NH <sub>2</sub>               | 29284                                                     | 20029 | 8328        |
| WK <sub>4</sub> Inp <sub>2</sub> <sup>t</sup> LArgA <sub>18</sub> <sup>t</sup> LInp <sub>2</sub> K <sub>4</sub> NH <sub>2</sub>                | 22419                                                     | 13118 | 4994        |
| WK <sub>4</sub> Inp <sub>2</sub> <sup>t</sup> LA <sub>4</sub> ArgA <sub>14</sub> <sup>t</sup> LInp <sub>2</sub> K <sub>4</sub> NH <sub>2</sub> | 22006                                                     | 12016 | 4421        |
| WK <sub>4</sub> Inp <sub>2</sub> <sup>t</sup> LA <sub>9</sub> ArgA <sub>9</sub> <sup>t</sup> LInp <sub>2</sub> K <sub>4</sub> NH <sub>2</sub>  | 24321                                                     | 14644 | 5296        |
| WK <sub>4</sub> Inp <sub>2</sub> <sup>t</sup> LA <sub>12</sub> ArgA <sub>6</sub> <sup>t</sup> LInp <sub>2</sub> K <sub>4</sub> NH <sub>2</sub> | 26244                                                     | 16623 | 6571        |
| WK <sub>4</sub> Inp <sub>2</sub> <sup>t</sup> LA <sub>15</sub> ArgA <sub>3</sub> <sup>t</sup> LInp <sub>2</sub> K <sub>4</sub> NH <sub>2</sub> | 27013                                                     | 18068 | 7266        |
| WK <sub>4</sub> Inp <sub>2</sub> <sup>t</sup> LA <sub>18</sub> Arg <sup>t</sup> LInp <sub>2</sub> K <sub>4</sub> NH <sub>2</sub>               | 28142                                                     | 19271 | 7604        |
| WK <sub>4</sub> Inp <sub>2</sub> <sup>t</sup> LA <sub>4</sub> HisA <sub>14</sub> <sup>t</sup> LInp <sub>2</sub> K <sub>4</sub> NH <sub>2</sub> | 17611                                                     | 9046  | 3177        |
| WK <sub>4</sub> Inp <sub>2</sub> <sup>t</sup> LA <sub>9</sub> HisA <sub>9</sub> <sup>t</sup> LInp <sub>2</sub> K <sub>4</sub> NH <sub>2</sub>  | 17620                                                     | 9259  | 3374        |
| WK <sub>4</sub> Inp <sub>2</sub> <sup>t</sup> LA <sub>12</sub> HisA <sub>6</sub> <sup>t</sup> LInp <sub>2</sub> K <sub>4</sub> NH <sub>2</sub> | 26244                                                     | 16623 | 6008        |
| WK <sub>4</sub> Inp <sub>2</sub> <sup>t</sup> LA <sub>15</sub> HisA <sub>3</sub> <sup>t</sup> LInp <sub>2</sub> K <sub>4</sub> NH <sub>2</sub> | 27013                                                     | 18068 | 7266        |
| WK <sub>4</sub> Inp <sub>2</sub> <sup>t</sup> LA <sub>18</sub> His <sup>t</sup> LInp <sub>2</sub> K <sub>4</sub> NH <sub>2</sub>               | 27733                                                     | 18800 | 8642        |
| WK <sub>4</sub> Inp <sub>2</sub> <sup>t</sup> LA <sub>9</sub> GluA <sub>9</sub> <sup>t</sup> LInp <sub>2</sub> K <sub>4</sub> NH <sub>2</sub>  | 26364                                                     | 14162 | 6232 pH 1.2 |
| WK <sub>4</sub> Inp <sub>2</sub> <sup>t</sup> LA <sub>9</sub> GluA <sub>9</sub> <sup>t</sup> LInp <sub>2</sub> K <sub>4</sub> NH <sub>2</sub>  | 26539                                                     | 16360 | 6609 pH 7   |
| WK <sub>4</sub> Inp <sub>2</sub> <sup>t</sup> LA <sub>9</sub> AspA <sub>9</sub> <sup>t</sup> LInp <sub>2</sub> K <sub>4</sub> NH <sub>2</sub>  | 20929                                                     | 11438 | 4694 pH 1.2 |
| WK <sub>4</sub> Inp <sub>2</sub> <sup>t</sup> LA <sub>9</sub> AspA <sub>9</sub> <sup>t</sup> LInp <sub>2</sub> K <sub>4</sub> NH <sub>2</sub>  | 23174                                                     | 12986 | 6198 pH 7   |

F. Double and Triple Lysine scan

|                                                                                                                                                                             | 2°C   | 25°C  | 60°C |
|-----------------------------------------------------------------------------------------------------------------------------------------------------------------------------|-------|-------|------|
| WK <sub>4</sub> Inp <sub>2</sub> <sup>1</sup> LA <sub>8</sub> K <sub>3</sub> A <sub>8</sub> <sup>1</sup> LInp <sub>2</sub> K <sub>4</sub> NH <sub>2</sub>                   | 10510 | 6154  | 6072 |
| WK <sub>4</sub> Inp <sub>2</sub> <sup>1</sup> LA <sub>7</sub> KAKAKA <sub>7</sub> <sup>1</sup> LInp <sub>2</sub> K <sub>4</sub> NH <sub>2</sub>                             | 7263  | 4673  | 5463 |
| WK <sub>4</sub> Inp <sub>2</sub> <sup>1</sup> LA <sub>6</sub> KA <sub>2</sub> KA <sub>2</sub> KA <sub>6</sub> <sup>1</sup> LInp <sub>2</sub> K <sub>4</sub> NH <sub>2</sub> | 5638  | 4039  | 5100 |
| WK <sub>4</sub> Inp <sub>2</sub> <sup>1</sup> LA <sub>5</sub> KA <sub>3</sub> KA <sub>3</sub> KA <sub>5</sub> <sup>1</sup> LInp <sub>2</sub> K <sub>4</sub> NH <sub>2</sub> | 6874  | 4583  | 5920 |
| WK <sub>4</sub> Inp <sub>2</sub> <sup>1</sup> LA <sub>4</sub> KA <sub>4</sub> KA <sub>4</sub> KA <sub>4</sub> <sup>1</sup> LInp <sub>2</sub> K <sub>4</sub> NH <sub>2</sub> | 12273 | 7030  | 6561 |
| WK <sub>4</sub> Inp <sub>2</sub> <sup>1</sup> LA <sub>6</sub> KA <sub>5</sub> KA <sub>6</sub> <sup>1</sup> LInp <sub>2</sub> K <sub>4</sub> NH <sub>2</sub>                 | 18159 | 10835 | 7799 |
| WK <sub>4</sub> Inp <sub>2</sub> <sup>1</sup> LA <sub>8</sub> KAKA <sub>8</sub> <sup>1</sup> LInp <sub>2</sub> K <sub>4</sub> NH <sub>2</sub>                               | 18018 | 10015 | 6897 |

## II. Molecular Ion MS Data for Series 2 Peptides

| <u>Peptide</u> | <u>m/z Found (Expected)</u>                                                                               |
|----------------|-----------------------------------------------------------------------------------------------------------|
| NleA14         | 753.26 (752.48), 602.80 (602.19), 502.52 (501.99), 430.90 (430.42),<br>377.17 (376.75)                    |
| ANleA13        | 753.23 (752.48), 602.78 (602.19), 502.52 (501.99), 430.88 (430.42),<br>377.06 (376.75)                    |
| A2NleA12       | 1003.98 (1002.98), 753.38 (752.48), 602.80 (602.19), 502.52 (501.99),<br>430.90 (430.42), 377.17 (376.75) |
| A3NleA11       | 1003.98 (1002.98), 753.26 (752.48), 602.80 (602.19), 502.52 (501.99),<br>430.90 (430.42), 377.17 (376.75) |
| A5NleA9        | 753.16 (752.48), 602.72 (602.19), 502.52 (501.99), 430.81 (430.42),<br>377.00 (376.75)                    |
| A7NleA7        | 1003.79 (1002.98), 753.38 (752.48), 602.87 (602.19), 502.52 (501.99),<br>430.96 (430.42), 377.17 (376.75) |
| A9NleA5        | 753.45 (752.48), 602.93 (602.19), 502.71 (501.99), 430.96 (430.42),<br>377.17 (376.75)                    |
| A11NleA3       | 753.23 (752.48), 602.85 (602.19), 502.52 (501.99), 430.88 (430.42),<br>377.19 (376.75), 251.66 (251.50)   |
| A12NleA2       | 602.52 (602.19), 502.26 (501.99), 430.68 (430.42), 376.86 (376.75),<br>251.46 (251.50)                    |
| A13NleA        | 1003.85 (1002.98), 753.52 (752.48), 602.80 (602.19), 502.52 (501.99),<br>430.90 (430.42), 377.17 (376.75) |
| A14Nle         | 1004.17 (1002.98), 753.20 (752.48), 602.80 (602.19), 502.58 (501.99),<br>430.90 (430.42), 377.11 (376.75) |
| NleA18         | 659.55 (659.02), 549.82 (549.35), 471.34 (471.02), 412.52 (412.26)                                        |
| ANleA17        | 659.62 (659.02), 549.82 (549.35), 471.34 (471.02), 412.65 (412.26)                                        |
| A2NleA16       | 659.55 (659.02), 550.02 (549.35), 471.47 (471.02), 412.72 (412.26)                                        |
| A3NleA15       | 824.43 (823.52), 659.77 (659.02), 549.95 (549.35), 471.54 (471.02),<br>412.76 (412.26)                    |
| A5NleA13       | 549.95 (549.35), 471.54 (471.02), 412.72 (412.26)                                                         |
| A7NleA11       | 659.69 (659.02), 549.95 (549.35), 471.54 (471.02), 412.65 (412.26)                                        |
| A2NleA13NleA2  | 667.81 (667.43), 556.43 (556.36), 477.09 (477.02), 417.56 (417.52)                                        |
| A5NleA7NleA5   | 668.07 (667.43), 556.81 (556.36), 477.53 (477.02), 417.94 (417.52)                                        |
| A6NleA4NleA6   | 668.01 (667.43), 556.81 (556.36), 477.47 (477.02), 417.88 (417.52)                                        |

|               |                                                                                                         |
|---------------|---------------------------------------------------------------------------------------------------------|
| A7NleA3NleA7  | 667.94 (667.43), 556.75 (556.36), 477.35 (477.02), 417.82 (417.52)                                      |
| A8NleA2NleA7  | 668.07 (667.43), 556.81 (556.36), 477.53 (477.02), 417.94 (417.52)                                      |
| A8NleANleA8   | 667.62 (667.43), 556.43 (556.36), 477.09 (477.02), 417.56 (417.52)                                      |
| A9NleNleA8    | 668.07 (667.43), 556.94 (556.36), 477.47 (477.02), 418.01 (417.52)                                      |
| A2NvaA13NvaA2 | 662.08 (661.82), 551.88 (551.69), 473.22 (473.02), 414.20 (414.02)                                      |
| A5NvaA7NvaA5  | 827.42 (827.03), 662.08 (661.82), 551.88 (551.69), 473.22 (473.02),<br>414.20 (414.02)                  |
| A6NvaA4NvaA6  | 827.55 (827.03), 662.26 (661.82), 551.94 (551.69), 473.35 (473.02),<br>414.26 (414.02)                  |
| A7NvaA3NvaA7  | 827.55 (827.03), 662.14 (661.82), 551.94 (551.69), 473.22 (473.02),<br>414.20 (414.02)                  |
| A8NvaA2NvaA7  | 827.98 (827.03), 662.58 (661.82), 552.32 (551.69), 473.60 (473.02),<br>414.51 (414.02)                  |
| A8NvaANvaA8   | 827.36 (827.03), 662.14 (661.82), 551.94 (551.69), 473.16 (473.02),<br>414.20 (414.02)                  |
| A9NvaNvaA8    | 827.74 (827.03), 662.45 (661.82), 552.19 (551.69), 473.41 (473.02),<br>414.38 (414.02)                  |
| A9NvaA9       | 820.76 (820.02), 656.78 (656.22), 547.52 (547.01), 469.42 (469.01),<br>410.89 (410.51), 365.39 (365.01) |
| A9ValValA8    | 828.17 (827.03), 662.51 (661.82), 552.32 (551.69), 473.60 (473.02),<br>414.51 (414.02)                  |
| A9ValA9       | 820.88 (820.02), 656.90 (656.22), 547.58 (547.01), 469.55 (469.01),<br>410.95 (410.51)                  |
| A9AbuAbuA8    | 820.94, 656.90, 547.52, 469.48, 410.89, 365.39                                                          |
| A9AbuA9       | 817.20, 653.97, 545.15, 467.43, 409.08, 363.83                                                          |
| A9LeuLeuA8    | 835.03 (83), 668.12 (667.43), 556.87 (556.36), 477.46 (477.02), 417.94<br>(417.52)                      |
| A9LeuA9       | 824.25 (823.52), 659.52 (659.02), 549.76 (549.35), 471.42 (471.02),<br>412.57 (412.26)                  |
| A9IleIleA8    | 835.03 (834.03), 668.25 (667.43), 556.99 (556.36), 477.59 (477.02),<br>418.06 (417.52)                  |
| A9IleA9       | 824.18 (823.52), 659.46 (659.02), 549.70 (549.35), 471.29 (471.02),<br>412.51 (412.26)                  |

|            |                                                                                        |
|------------|----------------------------------------------------------------------------------------|
| A9MetMetA8 | 843.69 (843.01), 675.10 (674.61), 562.79 (562.34), 482.51 (482.15),<br>422.30 (422.01) |
| A9MetA9    | 828.79 (828.01), 663.26 (662.61), 552.88 (552.34), 474.03 (473.58),<br>414.94 (414.51) |
| A9PhePheA8 | 681.33 (681.02), 567.92 (567.69), 486.96 (486.73), 426.27 (426.02)                     |
| A9PheA9    | 666.69 (665.82), 555.62 (555.01), 476.46 (475.87), 417.06 (416.51)                     |
| A9TyrTyrA8 | 687.56 (687.42), 573.02 (573.14), 491.43 (491.30), 430.10 (430.02)                     |
| A9TyrA9    | 836.76 (836.02), 669.71 (669.01), 558.13 (557.68), 478.56 (478.16),<br>418.88 (418.51) |
| A9AsnAsnA8 | 556.93 (556.68), 477.46 (477.30), 417.94 (417.76)                                      |
| A9AsnA9    | 659.71 (659.21), 549.89 (549.51), 471.42 (471.15), 412.64 (412.38)                     |
| A9SerSerA8 | 657.59 (657.01), 548.14 (547.67), 469.98 (469.58), 411.39 (411.01)                     |
| A9SerA9    | 654.22 (653.81), 545.29 (545.01), 467.49 (467.29), 409.20 (409.01)                     |
| A9ThrThrA8 | 552.82 (552.35), 473.97 (473.58), 414.88 (414.51)                                      |
| A9ThrA9    | 820.79 (820.51), 656.83 (656.61), 547.53 (547.34), 469.41(469.30),<br>410.86 (410.76)  |
| A9GlnGlnA8 | 673.79 (673.42), 561.65 (561.35), 481.58 (481.30), 421.51 (421.26)                     |
| A9GlnA9    | 551.94 (551.85), 473.22 (473.15)                                                       |
| A9GlyGlyA8 | 806.57 (806.00), 645.44 (645.00), 538.10 (537.67), 461.37 (461.00),<br>403.83 (403.50) |
| A9GlyA9    | 648.43 (647.81), 540.64 (540.01), 463.53 (463.01), 405.75 (405.26)                     |
| A9ProA9    | 820.03 (819.51), 656.26 (655.81), 547.02 (546.68), 468.97 (468.73),<br>410.55 (410.26) |
| LysA18     | 552.26 (551.85), 473.53 (473.16), 414.38 (414.14)                                      |
| ALysA17    | 552.26 (551.85), 473.53 (473.16), 414.44 (414.14)                                      |
| A2LysA16   | 662.07 (662.02), 551.95 (551.85), 473.13 (473.16), 414.21 (414.14)                     |
| A3LysA15   | 552.32 (551.85), 473.66 (473.16), 414.57 (414.14)                                      |
| HisA18     | 829.95 (829.51), 664.21 (663.81), 553.65 (553.35), 474.71 (474.44),<br>415.47 (415.26) |
| A4HisA14   | 829.76 (829.51), 664.03 (663.81), 553.46 (553.35), 474.52 (474.44),<br>415.41 (415.26) |



|                  |                                                                                                         |
|------------------|---------------------------------------------------------------------------------------------------------|
| A9HisA9          | 830.01 (829.51), 664.15 (663.81), 553.59 (553.35), 474.71 (474.44),<br>415.54 (415.26)                  |
| A12HisA6         | 829.69 (829.51), 663.90 (663.81), 553.46 (553.35), 474.52 (474.44),<br>415.28 (415.26)                  |
| A15HisA3         | 829.76 (829.51), 664.09 (663.81), 553.52 (553.35), 474.59 (474.44),<br>415.41 (415.26)                  |
| A18His           | 830.20 (829.51), 664.40 (663.81), 553.78 (553.35), 474.84 (474.44),<br>415.60 (415.26)                  |
| A9HisHisA8       | 846.51 (846.02), 677.48 (677.02), 564.71 (564.35), 484.23 (483.87),<br>423.87 (423.51), 376.92 (376.57) |
| ArgA18           | 834.87 (834.28), 668.13 (667.62), 556.93 (556.52), 477.55 (477.16)                                      |
| A4ArgA14         | 834.93 (834.28), 668.13 (667.62), 556.93 (556.52), 477.55 (477.16)                                      |
| A9ArgA9          | 667.753 (667.62), 556.62 (556.52), 477.24 (477.16), 417.68 (417.64)                                     |
| A12ArgA6         | 834.87 (834.28), 668.07 (667.62), 556.93 (556.52), 477.55 (477.16)                                      |
| A15ArgA3         | 834.49 (834.28), 667.75 (667.62), 556.56 (556.52), 477.24 (477.16),<br>417.68 (417.64)                  |
| A18Arg           | 834.49 (834.28), 667.88 (667.62), 556.68 (556.52), 477.37 (477.16),<br>417.81 (417.64)                  |
| A9ArgArgA8       | 685.18 (684.63), 571.08 (570.70), 489.68 (489.31), 428.61 (428.27)                                      |
| A9AspAspA8       | 835.82 (835.00), 668.82 (668.21), 557.57 (557.01), 478.06 (477.58),                                     |
| A9AspA9          | 824.83 (824.01), 660.05 (659.41), 550.18 (549.67), 471.81 (471.29)                                      |
| A9GluGluA8       | 842.76 (842.01), 674.38 (673.81), 562.18 (561.68), 482.04 (481.58),<br>421.91 (421.51)                  |
| A9GluA9          | 828.30 (827.51), 662.89 (662.21), 552.51 (552.01), 473.77 (473.30),<br>414.65 (414.26)                  |
| A9S(OMe)S(OMe)A8 | 828.88 (828.01), 663.32 (662.61), 552.82 (552.35), 474.17 (473.58),<br>415.05 (414.51)                  |
| A9S(OMe)A9       | 821.05 (820.51), 656.99 (656.61), 547.70 (547.34), 469.58(469.30),<br>411.08 (410.76)                   |

### III. $^{13}\text{C}=\text{O}$ NMR-derived Data and MS Data for Series 1 Peptides

Table 1. Helical propensities assigned from  $^{13}\text{C}=\text{O}$  chemical shifts in  $^1\text{L-Ala}_9\text{-Xxx-Ala}_9\text{-tL}$  at  $2^\circ\text{C}$ .

| Amino Acid | Helical Propensity at $T = 2^\circ\text{C}$ |       | $^{13}\text{C}=\text{O}$ Chemical Shift |         |         |
|------------|---------------------------------------------|-------|-----------------------------------------|---------|---------|
|            | $\varnothing w_{\text{Xxx}}$                | SD    | Site 12                                 | Site 14 | Site 15 |
| Ala        | 1.56                                        | -     | 180.576                                 | 180.261 | 179.995 |
| Nle        | 1.49                                        | 0.06  | 180.563                                 | 180.261 | 179.986 |
| Nva        | 1.47                                        | 0.05  | 180.564                                 | 180.287 | 179.991 |
| Glu        | 1.22                                        | 0.21  | 180.476                                 | 180.247 | 179.947 |
| Leu        | 1.10                                        | 0.20  | 180.448                                 | 180.229 | 179.926 |
| Arg        | 0.87                                        | 0.04  | 180.435                                 | 180.123 | 179.881 |
| Met        | 0.87                                        | 0.06  | 180.398                                 | 180.142 | 179.885 |
| Ile        | 0.78                                        | 0.02  | 180.389                                 | 180.087 | 179.858 |
| Gln        | 0.68                                        | 0.07  | 180.288                                 | 180.082 | 179.826 |
| Lys        | 0.67                                        | 0.06  | 180.357                                 | 180.036 | 179.807 |
| Asp        | 0.56                                        | 0.04  | 180.247                                 | 180.000 | 179.757 |
| Val        | 0.55                                        | 0.02  | 180.242                                 | 179.981 | 179.757 |
| Trp        | 0.53                                        | 0.08  | 180.142                                 | 180.005 | 179.752 |
| Phe        | 0.52                                        | 0.08  | 180.146                                 | 180.004 | 179.734 |
| Tyr        | 0.50                                        | 0.09  | 180.105                                 | 180.000 | 179.716 |
| Ser        | 0.45                                        | 0.07  | 180.151                                 | 179.931 | 179.633 |
| Asn        | 0.37                                        | 0.04  | 180.041                                 | 179.835 | 179.579 |
| Cys        | 0.37                                        | 0.02  | 180.032                                 | 179.821 | 179.611 |
| Thr        | 0.36                                        | 0.02  | 180.050                                 | 179.817 | -       |
| His        | 0.18                                        | 0.02  | 179.624                                 | 179.441 | 179.258 |
| Gly        | 0.17                                        | 0.02  | 179.592                                 | 179.377 | 179.212 |
| Pro        | 0.013                                       | 0.004 | 178.237                                 | 179.201 | 178.324 |

Table 2. Helical propensities assigned from  $^{13}\text{C}=\text{O}$  chemical shifts in  $^1\text{L-Ala}_9\text{-Xxx-Ala}_9\text{-tL}$  at  $25^\circ\text{C}$ .

| Amino Acid | Helical Propensity at $T = 25^\circ\text{C}$ |      | $^{13}\text{C}=\text{O}$ Chemical Shift |         |         |
|------------|----------------------------------------------|------|-----------------------------------------|---------|---------|
|            | $\varnothing w_{\text{Xxx}}$                 | SD   | Site 12                                 | Site 14 | Site 15 |
| Ala        | 1.39                                         | -    | 179.734                                 | 179.391 | 179.144 |
| Nle        | 1.37                                         | 0.06 | 179.707                                 | 179.405 | 179.139 |
| Nva        | 1.20                                         | 0.05 | 179.643                                 | 179.350 | 179.098 |
| Leu        | 1.15                                         | 0.10 | 179.597                                 | 179.354 | 179.079 |
| Glu        | 1.00                                         | 0.07 | 179.546                                 | 179.290 | 179.015 |
| Met        | 0.90                                         | 0.03 | 179.473                                 | 179.221 | 178.997 |
| Ile        | 0.81                                         | 0.03 | 179.418                                 | 179.176 | 178.956 |
| Arg        | 0.80                                         | 0.04 | 179.450                                 | 179.153 | 178.933 |
| Gln        | 0.72                                         | 0.03 | 179.327                                 | 179.121 | 178.906 |
| Trp        | 0.64                                         | 0.07 | 179.208                                 | 179.089 | 178.851 |
| Lys        | 0.60                                         | 0.04 | 179.276                                 | 179.006 | 178.814 |
| Asp        | 0.54                                         | 0.03 | 179.199                                 | 178.965 | 178.764 |
| Val        | 0.53                                         | 0.03 | 179.162                                 | 178.970 | 178.764 |
| Ser        | 0.51                                         | 0.03 | 179.144                                 | 178.951 | 178.732 |
| Phe        | 0.50                                         | 0.04 | 179.075                                 | 178.960 | 178.754 |
| Tyr        | 0.50                                         | 0.04 | 179.066                                 | 178.965 | 178.750 |
| Asn        | 0.43                                         | 0.04 | 179.038                                 | 178.846 | 178.663 |
| Thr        | 0.40                                         | 0.02 | 178.988                                 | 178.823 | -       |
| Cys        | 0.36                                         | 0.01 | 178.892                                 | 178.759 | 178.608 |
| Gly        | 0.22                                         | 0.02 | 178.613                                 | 178.471 | 178.361 |
| His        | 0.20                                         | 0.02 | 178.562                                 | 178.448 | 178.324 |
| Pro        | 0.045                                        | 0.01 | 177.949                                 | 177.926 | 177.972 |

**Table 3. Helical propensities assigned from  $^{13}\text{C}=\text{O}$  chemical shifts in  $^t\text{L-Ala}_9\text{-Xxx-Ala}_9\text{-tL}$  at  $60^\circ\text{C}$ .**

| Amino Acid | Helical Propensity at $T = 60^\circ\text{C}$ |      | $^{13}\text{C}=\text{O}$ Chemical Shift |         |         |
|------------|----------------------------------------------|------|-----------------------------------------|---------|---------|
|            | $\phi w_{\text{Xxx}}$                        | $SD$ | Site 12                                 | Site 14 | Site 15 |
| Nle        | 1.24                                         | 0.04 | 178.178                                 | 178.026 | 177.889 |
| Leu        | 1.22                                         | 0.05 | 178.159                                 | 178.022 | 177.885 |
| Ala        | 1.17                                         | -    | 178.159                                 | 177.999 | 177.857 |
| Nva        | 1.14                                         | 0.03 | 178.127                                 | 177.985 | 177.857 |
| Glu        | 1.04                                         | 0.01 | 178.086                                 | 177.949 | 177.817 |
| Met        | 0.99                                         | 0.04 | 178.036                                 | 177.921 | 177.816 |
| Ile        | 0.98                                         | 0.05 | 178.017                                 | 177.917 | 177.811 |
| Asp        | 0.94                                         | 0.03 | 178.045                                 | 177.875 | 177.770 |
| Trp        | 0.92                                         | 0.07 | 177.962                                 | 177.903 | 177.793 |
| Gln        | 0.86                                         | 0.04 | 177.958                                 | 177.866 | 177.766 |
| Ser        | 0.83                                         | 0.03 | 177.944                                 | 177.848 | 177.752 |
| Val        | 0.78                                         | 0.04 | 177.894                                 | 177.834 | 177.734 |
| Asn        | 0.75                                         | 0.05 | 177.926                                 | 177.784 | 177.720 |
| Tyr        | 0.72                                         | 0.06 | 177.830                                 | 177.811 | 177.715 |
| Phe        | 0.72                                         | 0.06 | 177.830                                 | 177.807 | 177.715 |
| Thr        | 0.71                                         | 0.02 | 177.848                                 | 177.788 | -       |
| Arg        | 0.70                                         | 0.03 | 177.880                                 | 177.770 | 177.688 |
| Lys        | 0.67                                         | 0.02 | 177.853                                 | 177.756 | 177.679 |
| Cys        | 0.59                                         | 0.03 | 177.734                                 | 177.734 | 177.660 |
| Gly        | 0.51                                         | 0.02 | 177.724                                 | 177.660 | 177.614 |
| Pro        | 0.31                                         | 0.03 | 177.541                                 | 177.541 | 177.541 |
| His        | 0.31                                         | 0.01 | 177.546                                 | 178.546 | 177.509 |

**Table 4. Relative free energies with standard deviations for the twenty naturally occurring amino acids plus norleucine and norvaline measured in  $^1\text{L-Ala}_9\text{-Xxx-Ala}_9\text{-}^1\text{L}$ , covering the temperature range of 2, 25, and 60°C.**

| <i>Amino Acid</i> | <i>T = 2°C</i>   |           | <i>T = 25°C</i>  |           | <i>T = 60°C</i>  |           |
|-------------------|------------------|-----------|------------------|-----------|------------------|-----------|
|                   | $\Delta\Delta G$ | <i>SD</i> | $\Delta\Delta G$ | <i>SD</i> | $\Delta\Delta G$ | <i>SD</i> |
| Ala               | 0.00             | 0.00      | 0.00             | 0.00      | 0.00             | 0.00      |
| Nle               | 0.02             | 0.02      | 0.01             | 0.03      | -0.04            | 0.02      |
| Nva               | 0.03             | 0.02      | 0.09             | 0.03      | 0.02             | 0.02      |
| Glu               | 0.14             | 0.09      | 0.19             | 0.04      | 0.08             | 0.00      |
| Leu               | 0.19             | 0.09      | 0.11             | 0.05      | -0.03            | 0.03      |
| Arg               | 0.32             | 0.03      | 0.33             | 0.03      | 0.34             | 0.03      |
| Met               | 0.32             | 0.04      | 0.26             | 0.02      | 0.11             | 0.03      |
| Ile               | 0.38             | 0.02      | 0.32             | 0.02      | 0.12             | 0.04      |
| Gln               | 0.45             | 0.06      | 0.39             | 0.03      | 0.20             | 0.03      |
| Lys               | 0.46             | 0.05      | 0.50             | 0.03      | 0.37             | 0.02      |
| Asp               | 0.56             | 0.04      | 0.56             | 0.04      | 0.15             | 0.02      |
| Val               | 0.57             | 0.02      | 0.57             | 0.03      | 0.26             | 0.04      |
| Trp               | 0.59             | 0.08      | 0.46             | 0.06      | 0.16             | 0.05      |
| Phe               | 0.60             | 0.08      | 0.60             | 0.05      | 0.33             | 0.06      |
| Tyr               | 0.63             | 0.10      | 0.60             | 0.05      | 0.30             | 0.06      |
| Ser               | 0.69             | 0.09      | 0.59             | 0.04      | 0.23             | 0.02      |
| Asn               | 0.79             | 0.07      | 0.69             | 0.03      | 0.29             | 0.05      |
| Cys               | 0.78             | 0.03      | 0.79             | 0.02      | 0.46             | 0.06      |
| Thr               | 0.79             | 0.06      | 0.74             | 0.06      | 0.33             | 0.04      |
| His               | 1.17             | 0.06      | 1.16             | 0.06      | 0.88             | 0.02      |
| Gly               | 1.22             | 0.06      | 1.10             | 0.05      | 0.55             | 0.04      |
| Pro               | 2.63             | 0.18      | 2.03             | 0.13      | 0.85             | 0.09      |

**Table 5. Chemical Shift Scan at 2, 25, and 60°C for the Series of Hydrophobic Guests in Ala<sub>19</sub>: W-K<sub>6</sub>-<sup>t</sup>L<sub>3</sub>-A<sub>9</sub>-Xxx-A<sub>9</sub>-<sup>t</sup>L<sub>3</sub>-K<sub>6</sub>-NH<sub>2</sub>; Xxx = Ala, Nva, Val**

| Site <sup>13</sup> C=O<br>Label | Chemical shift (ppm) measured at the Indicated Temperature |         |         |         |         |         |         |         |         |
|---------------------------------|------------------------------------------------------------|---------|---------|---------|---------|---------|---------|---------|---------|
|                                 | Ala                                                        |         |         | Nva     |         |         | Val     |         |         |
|                                 | 2°C                                                        | 25°C    | 60°C    | 2°C     | 25°C    | 60°C    | 2°C     | 25°C    | 60°C    |
| 1                               | 178.109                                                    | 177.656 | 176.969 | 178.091 | 177.619 | 176.928 | 178.013 | 177.500 | 176.910 |
| 2                               | 179.597                                                    | 178.722 | 177.560 | 179.580 | 178.640 | 177.514 | 179.221 | 178.278 | 177.408 |
| 3                               | 179.817                                                    | 178.960 | 177.697 | 179.859 | 178.878 | 177.669 | 179.441 | 178.452 | 177.518 |
| 4                               | 180.224                                                    | 179.258 | 177.862 | 180.151 | 179.121 | 177.775 | 179.743 | 178.649 | 177.614 |
| 5                               | 180.499                                                    | 179.537 | 177.999 | 180.385 | 179.372 | 177.917 | 179.899 | 178.773 | 177.651 |
| 6                               | 180.590                                                    | 179.675 | 178.086 | 180.325 | 179.372 | 177.949 | 179.569 | 178.645 | 177.660 |
| 7                               | 180.654                                                    | 179.771 | 178.168 | 180.710 | 179.752 | 178.159 | 180.384 | 179.153 | 177.766 |
| 8                               | 180.709                                                    | 179.844 | 178.210 | 180.499 | 179.643 | 178.127 | 179.977 | 178.970 | 177.729 |
| 9                               | 180.723                                                    | 179.885 | 178.242 | 180.755 | 179.913 | 178.315 | 180.650 | 179.459 | 178.063 |
| 10                              | 180.705                                                    | 179.881 | 178.228 | 180.302 | 180.421 | -       | 180.302 | 179.176 | 177.802 |
| 11                              | 180.673                                                    | 179.821 | 178.223 | 180.242 | 180.316 | Table 3 | 180.242 | 179.162 | 177.894 |
| 12                              | 180.576                                                    | 179.734 | 178.159 | 180.045 | 180.132 | -       | 180.045 | 179.038 | 177.871 |
| 14                              | 180.261                                                    | 179.391 | 177.999 | 179.981 | 180.004 | Table 3 | 179.981 | 178.970 | 177.834 |
| 15                              | 179.995                                                    | 179.144 | 177.857 | 179.757 | 179.739 | Table 3 | 179.757 | 178.764 | 177.734 |
| 17                              | 178.384                                                    | 177.903 | 177.267 | 179.359 | 179.327 | -       | 179.359 | 178.471 | 177.587 |
| 18                              | 177.702                                                    | 177.473 | 177.088 | 178.301 | 178.237 | -       | 178.301 | 177.775 | 177.221 |
| 19                              | 177.477                                                    | 177.340 | 177.051 | 177.683 | 177.633 | -       | 177.683 | 177.418 | 177.065 |

**Table 6. Chemical Shift Scan at 2, 25, and 60°C for the Series of Hydrophobic Guests in Ala<sub>19</sub>: W-K<sub>6</sub>-<sup>t</sup>L<sub>3</sub>-A<sub>9</sub>-Xxx-A<sub>9</sub>-<sup>t</sup>L<sub>3</sub>-K<sub>6</sub>-NH<sub>2</sub>; Xxx = Leu, Ile, Ile**

| Site <sup>13</sup> C=O<br>Label | Chemical shift (ppm) measured at the Indicated Temperature |         |         |         |         |         |         |         |         |
|---------------------------------|------------------------------------------------------------|---------|---------|---------|---------|---------|---------|---------|---------|
|                                 | Leu                                                        |         |         | Ile     |         |         | Ile     |         |         |
|                                 | 2°C                                                        | 25°C    | 60°C    | 2°C     | 25°C    | 60°C    | 2°C     | 25°C    | 60°C    |
| 1                               | 178.095                                                    | 177.628 | 176.960 | 178.114 | 177.656 | 176.969 | 177.990 | 177.518 | 176.891 |
| 2                               | 179.473                                                    | 178.594 | 177.509 | 179.542 | 178.658 | 177.523 | 179.272 | 178.420 | 177.431 |
| 3                               | 179.743                                                    | 178.823 | 177.665 | 179.807 | 178.906 | 177.697 | 179.510 | 178.567 | 177.540 |
| 4                               | 180.087                                                    | 179.116 | 177.834 | 180.183 | 179.208 | 177.848 | 179.826 | 178.809 | 177.656 |
| 5                               | 180.279                                                    | 179.295 | 177.930 | 180.407 | 179.441 | 177.976 | 180.018 | 179.020 | 177.756 |
| 6                               | 180.206                                                    | 179.258 | 177.949 | 180.384 | 179.423 | 177.990 | 179.858 | 178.864 | 177.729 |
| 7                               | 180.728                                                    | 179.844 | 178.297 | 180.696 | 179.826 | 178.232 | 180.522 | 179.459 | 177.917 |
| 8                               | 180.467                                                    | 179.638 | 178.205 | 180.549 | 179.716 | 178.182 | 180.160 | 179.263 | 177.875 |
| 9                               | 180.934                                                    | 180.027 | 178.406 | 180.810 | 180.027 | 178.411 | 180.824 | 179.748 | 178.168 |
| 10                              | 180.609                                                    | 179.720 | 178.168 | 180.663 | 179.784 | 178.173 | 180.430 | 179.455 | 177.917 |
| 11                              | 180.448                                                    | 179.597 | 178.159 | 180.563 | 179.707 | 178.178 | 180.389 | 179.418 | 178.017 |
| 12                              | 180.302                                                    | 179.464 | 178.100 | 180.375 | 179.546 | 178.113 | 180.174 | 179.276 | 177.985 |
| 14                              | 180.229                                                    | 179.354 | 178.022 | 180.261 | 179.405 | 178.026 | 180.087 | 179.176 | 177.917 |
| 15                              | 179.926                                                    | 179.079 | 177.885 | 179.986 | 179.139 | 177.889 | 179.858 | 178.956 | 177.811 |
| 17                              | 179.519                                                    | 178.718 | 177.701 | 179.583 | 178.777 | 177.701 | 179.492 | 178.635 | 177.642 |
| 18                              | 178.356                                                    | 177.894 | 177.276 | 178.393 | 177.917 | 177.280 | 178.338 | 177.853 | 177.253 |
| 19                              | 177.702                                                    | 177.473 | 177.102 | 177.711 | 177.477 | 177.097 | 177.702 | 177.459 | 177.083 |

**Table 7.  $^{13}\text{C}=\text{O}$  Labeling and Mass Spec Data for  $^1\text{L}_3\text{-A}_9\text{-Xxx-A}_9\text{-}^1\text{L}_3$ ; Xxx = 20 Natural Amino Acids plus Nle, Nva**

Note: Every peptide synthesized in this study was C-terminally amidated.

| Peptide Sequence                                                                                                               | Site $^{13}\text{C}=\text{O}$ Label | Percent $^{13}\text{C}=\text{O}$ Label | Average MW (Da) | $[m+z\text{H}]/z$ Expected |        |        |        |        | $[m+z\text{H}]/z$ Observed |        |        |        |        |
|--------------------------------------------------------------------------------------------------------------------------------|-------------------------------------|----------------------------------------|-----------------|----------------------------|--------|--------|--------|--------|----------------------------|--------|--------|--------|--------|
|                                                                                                                                |                                     |                                        |                 | 4                          | 5      | 6      | 7      | 8      | 4                          | 5      | 6      | 7      | 8      |
| <i>Xxx = 20 Natural Amino Acids plus Nle, Nva</i>                                                                              |                                     |                                        |                 |                            |        |        |        |        |                            |        |        |        |        |
| W-K <sub>6</sub> <sup>-1</sup> L <sub>3</sub> -A <sub>9</sub> -A-A <sub>9</sub> <sup>-1</sup> L <sub>3</sub> -K <sub>6</sub>   | 12,14,15                            | 100/75/50                              | 3772.78         | 943.62                     | 755.10 | 629.42 | 539.64 | 472.31 | 944.00                     | 756.00 | 630.00 | 540.00 | 472.00 |
| W-K <sub>6</sub> <sup>-1</sup> L <sub>3</sub> -A <sub>9</sub> -C-A <sub>9</sub> <sup>-1</sup> L <sub>3</sub> -K <sub>6</sub>   | 12,14,15                            | 100/75/50                              | 3804.84         | 951.61                     | 761.49 | 634.74 | 544.21 | 476.31 | 952.00                     | 762.00 | 635.00 | 544.00 | 476.00 |
| W-K <sub>6</sub> <sup>-1</sup> L <sub>3</sub> -A <sub>9</sub> -D-A <sub>9</sub> <sup>-1</sup> L <sub>3</sub> -K <sub>6</sub>   | 12,14,15                            | 100/75/50                              | 3816.79         | 954.62                     | 763.90 | 636.75 | 545.93 | 477.81 | 955.00                     | 764.00 | 637.00 | 546.00 | 478.00 |
| W-K <sub>6</sub> <sup>-1</sup> L <sub>3</sub> -A <sub>9</sub> -E-A <sub>9</sub> <sup>-1</sup> L <sub>3</sub> -K <sub>6</sub>   | 12,14,15                            | 100/75/50                              | 3830.81         | 958.12                     | 766.70 | 639.08 | 547.93 | 479.56 | 959.00                     | 767.00 | 639.00 | 548.00 | 480.00 |
| W-K <sub>6</sub> <sup>-1</sup> L <sub>3</sub> -A <sub>9</sub> -F-A <sub>9</sub> <sup>-1</sup> L <sub>3</sub> -K <sub>6</sub>   | 12,14,15                            | 100/75/50                              | 3848.87         | 962.63                     | 770.30 | 642.09 | 550.51 | 481.82 | 963.00                     | 771.00 | 643.00 | 551.00 | 482.00 |
| W-K <sub>6</sub> <sup>-1</sup> L <sub>3</sub> -A <sub>9</sub> -G-A <sub>9</sub> <sup>-1</sup> L <sub>3</sub> -K <sub>6</sub>   | 12,14,15                            | 100/75/50                              | 3758.75         | 940.12                     | 752.29 | 627.08 | 537.64 | 470.56 | 940.00                     | 753.00 | 627.00 | 538.00 | 471.00 |
| W-K <sub>6</sub> <sup>-1</sup> L <sub>3</sub> -A <sub>9</sub> -H-A <sub>9</sub> <sup>-1</sup> L <sub>3</sub> -K <sub>6</sub>   | 12,14,15                            | 100/75/50                              | 3838.84         | 960.13                     | 768.30 | 640.42 | 549.08 | 480.57 | 961.00                     | 768.00 | 641.00 | 550.00 | 481.00 |
| W-K <sub>6</sub> <sup>-1</sup> L <sub>3</sub> -A <sub>9</sub> -I-A <sub>9</sub> <sup>-1</sup> L <sub>3</sub> -K <sub>6</sub>   | 12,14,15                            | 100/75/50                              | 3814.86         | 954.13                     | 763.51 | 636.42 | 545.65 | 477.57 | 955.00                     | 764.00 | 637.00 | 546.00 | 478.00 |
| W-K <sub>6</sub> <sup>-1</sup> L <sub>3</sub> -A <sub>9</sub> -K-A <sub>9</sub> <sup>-1</sup> L <sub>3</sub> -K <sub>6</sub>   | 12,14,15                            | 100/75/50                              | 3829.87         | 957.88                     | 766.51 | 683.93 | 547.79 | 479.45 | 958.00                     | 767.00 | 640.00 | 548.00 | 480.00 |
| W-K <sub>6</sub> <sup>-1</sup> L <sub>3</sub> -A <sub>9</sub> -L-A <sub>9</sub> <sup>-1</sup> L <sub>3</sub> -K <sub>6</sub>   | 12,14,15                            | 100/75/50                              | 3814.86         | 954.13                     | 763.51 | 636.42 | 545.65 | 477.57 | 954.00                     | 764.00 | 636.00 | 546.00 | 478.00 |
| W-K <sub>6</sub> <sup>-1</sup> L <sub>3</sub> -A <sub>9</sub> -M-A <sub>9</sub> <sup>-1</sup> L <sub>3</sub> -K <sub>6</sub>   | 12,14,15                            | 100/75/50                              | 3832.90         | 958.62                     | 767.10 | 639.42 | 548.22 | 479.81 | 959.00                     | 767.00 | 640.00 | 549.00 | 480.00 |
| W-K <sub>6</sub> <sup>-1</sup> L <sub>3</sub> -A <sub>9</sub> -N-A <sub>9</sub> <sup>-1</sup> L <sub>3</sub> -K <sub>6</sub>   | 12,14,15                            | 100/75/50                              | 3815.80         | 954.37                     | 763.70 | 636.58 | 545.79 | 477.69 | 955.00                     | 764.00 | 637.00 | 546.00 | 478.00 |
| W-K <sub>6</sub> <sup>-1</sup> L <sub>3</sub> -A <sub>9</sub> -P-A <sub>9</sub> <sup>-1</sup> L <sub>3</sub> -K <sub>6</sub>   | 12,14,15                            | 100/75/50                              | 3798.81         | 950.12                     | 760.30 | 633.75 | 543.36 | 475.57 | 951.00                     | 761.00 | 634.00 | 544.00 | 476.00 |
| W-K <sub>6</sub> <sup>-1</sup> L <sub>3</sub> -A <sub>9</sub> -Q-A <sub>9</sub> <sup>-1</sup> L <sub>3</sub> -K <sub>6</sub>   | 12,14,15                            | 100/75/50                              | 3829.83         | 957.88                     | 766.50 | 638.92 | 547.79 | 479.44 | 958.00                     | 767.00 | 639.00 | 548.00 | 479.00 |
| W-K <sub>6</sub> <sup>-1</sup> L <sub>3</sub> -A <sub>9</sub> -R-A <sub>9</sub> <sup>-1</sup> L <sub>3</sub> -K <sub>6</sub>   | 12,14,15                            | 100/75/50                              | 3857.88         | 964.89                     | 772.11 | 643.59 | 551.80 | 482.95 | 965.00                     | 772.00 | 644.00 | 552.00 | 483.00 |
| W-K <sub>6</sub> <sup>-1</sup> L <sub>3</sub> -A <sub>9</sub> -S-A <sub>9</sub> <sup>-1</sup> L <sub>3</sub> -K <sub>6</sub>   | 12,14,15                            | 100/75/50                              | 3788.78         | 947.62                     | 758.30 | 632.08 | 541.93 | 474.31 | 948.00                     | 758.00 | 632.00 | 542.00 | 475.00 |
| W-K <sub>6</sub> <sup>-1</sup> L <sub>3</sub> -A <sub>9</sub> -T-A <sub>9</sub> <sup>-1</sup> L <sub>3</sub> -K <sub>6</sub>   | 12,14,16                            | 100/75/50                              | 3802.80         | 951.12                     | 761.10 | 634.42 | 543.93 | 476.07 | 951.00                     | 761.00 | 635.00 | 544.00 | 477.00 |
| W-K <sub>6</sub> <sup>-1</sup> L <sub>3</sub> -A <sub>9</sub> -V-A <sub>9</sub> <sup>-1</sup> L <sub>3</sub> -K <sub>6</sub>   | 12,14,15                            | 100/75/50                              | 3800.83         | 950.63                     | 760.70 | 634.09 | 543.65 | 475.82 | 951.00                     | 761.00 | 634.00 | 544.00 | 476.00 |
| W-K <sub>6</sub> <sup>-1</sup> L <sub>3</sub> -A <sub>9</sub> -W-A <sub>9</sub> <sup>-1</sup> L <sub>3</sub> -K <sub>6</sub>   | 12,14,15                            | 100/75/50                              | 3887.91         | 972.38                     | 778.11 | 648.59 | 556.08 | 486.69 | 972.00                     | 778.00 | 649.00 | 556.00 | 487.00 |
| W-K <sub>6</sub> <sup>-1</sup> L <sub>3</sub> -A <sub>9</sub> -Y-A <sub>9</sub> <sup>-1</sup> L <sub>3</sub> -K <sub>6</sub>   | 12,14,15                            | 100/75/50                              | 3864.87         | 966.63                     | 773.50 | 644.75 | 552.79 | 483.82 | 967.00                     | 774.00 | 645.00 | 553.00 | 484.00 |
| W-K <sub>6</sub> <sup>-1</sup> L <sub>3</sub> -A <sub>9</sub> -Nle-A <sub>9</sub> <sup>-1</sup> L <sub>3</sub> -K <sub>6</sub> | 12,14,15                            | 100/75/50                              | 3814.86         | 954.13                     | 763.51 | 636.42 | 545.65 | 477.57 | 955.00                     | 764.00 | 637.00 | 545.00 | 478.00 |
| W-K <sub>6</sub> <sup>-1</sup> L <sub>3</sub> -A <sub>9</sub> -Nva-A <sub>9</sub> <sup>-1</sup> L <sub>3</sub> -K <sub>6</sub> | 12,14,15                            | 100/75/50                              | 3800.83         | 950.63                     | 760.70 | 634.09 | 543.65 | 475.82 | 951.00                     | 761.00 | 635.00 | 544.00 | 476.00 |

**Table 8.  $^{13}\text{C}=\text{O}$  Labeling and Mass Spec Data for Chemical Shift Scans of  $^1\text{L}_3\text{-A}_9\text{-Xxx-A}_9\text{-}^1\text{L}_3$ ; Xxx = Ala, Ile**

Note: Every peptide synthesized in this study was C-terminally amidated.

| Peptide Sequence                                                                                                               | Site $^{13}\text{C}=\text{O}$ Label | Percent $^{13}\text{C}=\text{O}$ Label | Average MW (Da) | $[m+z\text{H}]/z$ Expected |        |        |        |        | $[m+z\text{H}]/z$ Observed |        |        |        |        |
|--------------------------------------------------------------------------------------------------------------------------------|-------------------------------------|----------------------------------------|-----------------|----------------------------|--------|--------|--------|--------|----------------------------|--------|--------|--------|--------|
|                                                                                                                                |                                     |                                        |                 | 4                          | 5      | 6      | 7      | 8      | 4                          | 5      | 6      | 7      | 8      |
| <i>Xxx = Ala</i>                                                                                                               |                                     |                                        |                 |                            |        |        |        |        |                            |        |        |        |        |
| W-K <sub>6</sub> - <sup>1</sup> L <sub>3</sub> -A <sub>9</sub> -A-A <sub>9</sub> - <sup>1</sup> L <sub>3</sub> -K <sub>6</sub> | 1,4,7                               | 100/80/60                              | 3772.78         | 943.62                     | 755.10 | 629.42 | 539.64 | 472.31 | 944.00                     | 756.00 | 630.00 | 540.00 | 472.00 |
| W-K <sub>6</sub> - <sup>1</sup> L <sub>3</sub> -A <sub>9</sub> -A-A <sub>9</sub> - <sup>1</sup> L <sub>3</sub> -K <sub>6</sub> | 2,5,8                               | 25/50/100                              | 3772.78         | 943.62                     | 755.10 | 629.42 | 539.64 | 472.31 | 944.00                     | 756.00 | 630.00 | 540.00 | 472.00 |
| W-K <sub>6</sub> - <sup>1</sup> L <sub>3</sub> -A <sub>9</sub> -A-A <sub>9</sub> - <sup>1</sup> L <sub>3</sub> -K <sub>6</sub> | 3,6,9                               | 25/50/100                              | 3772.78         | 943.62                     | 755.10 | 629.42 | 539.64 | 472.31 | 944.00                     | 756.00 | 630.00 | 540.00 | 472.00 |
| W-K <sub>6</sub> - <sup>1</sup> L <sub>3</sub> -A <sub>9</sub> -A-A <sub>9</sub> - <sup>1</sup> L <sub>3</sub> -K <sub>6</sub> | 3,10,19                             | 25/50/100                              | 3772.78         | 943.62                     | 755.10 | 629.42 | 539.64 | 472.31 | 944.00                     | 756.00 | 630.00 | 540.00 | 472.00 |
| W-K <sub>6</sub> - <sup>1</sup> L <sub>3</sub> -A <sub>9</sub> -A-A <sub>9</sub> - <sup>1</sup> L <sub>3</sub> -K <sub>6</sub> | 11,14,17                            | 25/50/100                              | 3772.78         | 943.62                     | 755.10 | 629.42 | 539.64 | 472.31 | 944.00                     | 756.00 | 630.00 | 540.00 | 472.00 |
| W-K <sub>6</sub> - <sup>1</sup> L <sub>3</sub> -A <sub>9</sub> -A-A <sub>9</sub> - <sup>1</sup> L <sub>3</sub> -K <sub>6</sub> | 12,15,18                            | 25/50/100                              | 3772.78         | 943.62                     | 755.10 | 629.42 | 539.64 | 472.31 | 944.00                     | 756.00 | 630.00 | 540.00 | 472.00 |
| W-K <sub>6</sub> - <sup>1</sup> L <sub>3</sub> -A <sub>9</sub> -A-A <sub>9</sub> - <sup>1</sup> L <sub>3</sub> -K <sub>6</sub> | 13,15,17                            | 25/50/100                              | 3772.78         | 943.62                     | 755.10 | 629.42 | 539.64 | 472.31 | 944.00                     | 756.00 | 630.00 | 540.00 | 472.00 |
| <i>Xxx = Ile</i>                                                                                                               |                                     |                                        |                 |                            |        |        |        |        |                            |        |        |        |        |
| W-K <sub>6</sub> - <sup>1</sup> L <sub>3</sub> -A <sub>9</sub> -I-A <sub>9</sub> - <sup>1</sup> L <sub>3</sub> -K <sub>6</sub> | 1,4,7                               | 25/50/100                              | 3814.86         | 954.13                     | 763.51 | 636.42 | 545.65 | 477.57 | 955.00                     | 764.00 | 637.00 | 546.00 | 478.00 |
| W-K <sub>6</sub> - <sup>1</sup> L <sub>3</sub> -A <sub>9</sub> -I-A <sub>9</sub> - <sup>1</sup> L <sub>3</sub> -K <sub>6</sub> | 2,5,8                               | 25/50/100                              | 3814.86         | 954.13                     | 763.51 | 636.42 | 545.65 | 477.57 | 955.00                     | 764.00 | 637.00 | 546.00 | 478.00 |
| W-K <sub>6</sub> - <sup>1</sup> L <sub>3</sub> -A <sub>9</sub> -I-A <sub>9</sub> - <sup>1</sup> L <sub>3</sub> -K <sub>6</sub> | 3,6,9                               | 25/50/100                              | 3814.86         | 954.13                     | 763.51 | 636.42 | 545.65 | 477.57 | 955.00                     | 764.00 | 637.00 | 546.00 | 478.00 |
| W-K <sub>6</sub> - <sup>1</sup> L <sub>3</sub> -A <sub>9</sub> -I-A <sub>9</sub> - <sup>1</sup> L <sub>3</sub> -K <sub>6</sub> | 11,14,17                            | 25/50/100                              | 3814.86         | 954.13                     | 763.51 | 636.42 | 545.65 | 477.57 | 955.00                     | 764.00 | 637.00 | 546.00 | 478.00 |
| W-K <sub>6</sub> - <sup>1</sup> L <sub>3</sub> -A <sub>9</sub> -I-A <sub>9</sub> - <sup>1</sup> L <sub>3</sub> -K <sub>6</sub> | 12,15,18                            | 25/50/100                              | 3814.86         | 954.13                     | 763.51 | 636.42 | 545.65 | 477.57 | 955.00                     | 764.00 | 637.00 | 546.00 | 478.00 |
| W-K <sub>6</sub> - <sup>1</sup> L <sub>3</sub> -A <sub>9</sub> -I-A <sub>9</sub> - <sup>1</sup> L <sub>3</sub> -K <sub>6</sub> | 13,16,19                            | 25/50/100                              | 3814.86         | 954.13                     | 763.51 | 636.42 | 545.65 | 477.57 | 955.00                     | 764.00 | 637.00 | 546.00 | 478.00 |



**Table 9.  $^{13}\text{C}=\text{O}$  Labeling and Mass Spec Data for Chemical Shift Scans of  $^1\text{L}_3\text{-A}_9\text{-Xxx-A}_9\text{-}^1\text{L}_3$ ; Xxx = Leu, Nle, Nva, Val**

Note: Every peptide synthesized in this study was C-terminally amidated.

| Peptide Sequence                                                                                                                 | Site $^{13}\text{C}=\text{O}$ Label | Percent $^{13}\text{C}=\text{O}$ Label | Average MW (Da) | $[m+z\text{H}]/z$ Expected |        |        |        |        | $[m+z\text{H}]/z$ Observed |        |        |        |        |
|----------------------------------------------------------------------------------------------------------------------------------|-------------------------------------|----------------------------------------|-----------------|----------------------------|--------|--------|--------|--------|----------------------------|--------|--------|--------|--------|
|                                                                                                                                  |                                     |                                        |                 | 4                          | 5      | 6      | 7      | 8      | 4                          | 5      | 6      | 7      | 8      |
| <i>Xxx = Leu</i>                                                                                                                 |                                     |                                        |                 |                            |        |        |        |        |                            |        |        |        |        |
| W-K <sub>6</sub> - <sup>1</sup> L <sub>3</sub> -A <sub>9</sub> -L-A <sub>9</sub> - <sup>1</sup> L <sub>3</sub> -K <sub>6</sub>   | 1,4,7                               | 25/50/100                              | 3814.86         | 954.13                     | 763.51 | 636.42 | 545.65 | 477.57 | 954.00                     | 764.00 | 637.00 | 546.00 | 478.00 |
| W-K <sub>6</sub> - <sup>1</sup> L <sub>3</sub> -A <sub>9</sub> -L-A <sub>9</sub> - <sup>1</sup> L <sub>3</sub> -K <sub>6</sub>   | 2,5,8                               | 25/50/100                              | 3814.86         | 954.13                     | 763.51 | 636.42 | 545.65 | 477.57 | 954.00                     | 764.00 | 637.00 | 546.00 | 478.00 |
| W-K <sub>6</sub> - <sup>1</sup> L <sub>3</sub> -A <sub>9</sub> -L-A <sub>9</sub> - <sup>1</sup> L <sub>3</sub> -K <sub>6</sub>   | 3,6,9                               | 25/50/100                              | 3814.86         | 954.13                     | 763.51 | 636.42 | 545.65 | 477.57 | 954.00                     | 764.00 | 637.00 | 546.00 | 478.00 |
| W-K <sub>6</sub> - <sup>1</sup> L <sub>3</sub> -A <sub>9</sub> -L-A <sub>9</sub> - <sup>1</sup> L <sub>3</sub> -K <sub>6</sub>   | 11,14,17                            | 25/50/100                              | 3814.86         | 954.13                     | 763.51 | 636.42 | 545.65 | 477.57 | 954.00                     | 764.00 | 637.00 | 546.00 | 478.00 |
| W-K <sub>6</sub> - <sup>1</sup> L <sub>3</sub> -A <sub>9</sub> -L-A <sub>9</sub> - <sup>1</sup> L <sub>3</sub> -K <sub>6</sub>   | 12,15,18                            | 25/50/100                              | 3814.86         | 954.13                     | 763.51 | 636.42 | 545.65 | 477.57 | 954.00                     | 764.00 | 637.00 | 546.00 | 478.00 |
| W-K <sub>6</sub> - <sup>1</sup> L <sub>3</sub> -A <sub>9</sub> -L-A <sub>9</sub> - <sup>1</sup> L <sub>3</sub> -K <sub>6</sub>   | 13,16,19                            | 25/50/100                              | 3814.86         | 954.13                     | 763.51 | 636.42 | 545.65 | 477.57 | 954.00                     | 764.00 | 637.00 | 546.00 | 478.00 |
| <i>Xxx = Nle</i>                                                                                                                 |                                     |                                        |                 |                            |        |        |        |        |                            |        |        |        |        |
| W-K <sub>6</sub> - <sup>1</sup> L <sub>3</sub> -A <sub>9</sub> -Nle-A <sub>9</sub> - <sup>1</sup> L <sub>3</sub> -K <sub>6</sub> | 1,3,5,7,9                           | 20/40/60/80/100                        | 3816.86         | 954.63                     | 763.91 | 636.76 | 545.94 | 477.82 | 955.00                     | 764.00 | 637.00 | 546.00 | 478.00 |
| W-K <sub>6</sub> - <sup>1</sup> L <sub>3</sub> -A <sub>9</sub> -Nle-A <sub>9</sub> - <sup>1</sup> L <sub>3</sub> -K <sub>6</sub> | 2,4,6,8                             | 25/50/75/100                           | 3815.85         | 954.38                     | 763.71 | 636.59 | 545.79 | 477.70 | 954.00                     | 764.00 | 637.00 | 546.00 | 478.00 |
| W-K <sub>6</sub> - <sup>1</sup> L <sub>3</sub> -A <sub>9</sub> -Nle-A <sub>9</sub> - <sup>1</sup> L <sub>3</sub> -K <sub>6</sub> | 12,14,16,18                         | 25/50/75/100                           | 3815.85         | 954.38                     | 763.71 | 636.59 | 545.79 | 477.70 | 954.00                     | 764.00 | 637.00 | 546.00 | 478.00 |
| W-K <sub>6</sub> - <sup>1</sup> L <sub>3</sub> -A <sub>9</sub> -Nle-A <sub>9</sub> - <sup>1</sup> L <sub>3</sub> -K <sub>6</sub> | 11,13,15,17,19                      | 20/40/60/80/100                        | 3816.86         | 954.63                     | 763.91 | 636.76 | 545.94 | 477.82 | 955.00                     | 764.00 | 637.00 | 546.00 | 478.00 |
| <i>Xxx = Nva</i>                                                                                                                 |                                     |                                        |                 |                            |        |        |        |        |                            |        |        |        |        |
| W-K <sub>6</sub> - <sup>1</sup> L <sub>3</sub> -A <sub>9</sub> -Nva-A <sub>9</sub> - <sup>1</sup> L <sub>3</sub> -K <sub>6</sub> | 1,4,9                               | 25/50/100                              | 3800.83         | 950.63                     | 760.70 | 634.09 | 543.65 | 475.82 | 951.00                     | 761.00 | 634.00 | 544.00 | 476.00 |
| W-K <sub>6</sub> - <sup>1</sup> L <sub>3</sub> -A <sub>9</sub> -Nva-A <sub>9</sub> - <sup>1</sup> L <sub>3</sub> -K <sub>6</sub> | 2,4,6,8                             | 25/50/75/100                           | 3801.83         | 950.88                     | 760.90 | 634.26 | 543.79 | 475.94 | 951.00                     | 761.00 | 635.00 | 544.00 | 476.00 |
| W-K <sub>6</sub> - <sup>1</sup> L <sub>3</sub> -A <sub>9</sub> -Nva-A <sub>9</sub> - <sup>1</sup> L <sub>3</sub> -K <sub>6</sub> | 2,3,5,6,7                           | 20/40/60/80/100                        | 3802.84         | 951.13                     | 761.11 | 634.42 | 543.93 | 476.07 | 952.00                     | 761.00 | 634.00 | 544.00 | 476.00 |
| W-K <sub>6</sub> - <sup>1</sup> L <sub>3</sub> -A <sub>9</sub> -Nva-A <sub>9</sub> - <sup>1</sup> L <sub>3</sub> -K <sub>6</sub> | 8,12,14,16,18                       | 20/40/60/80/100                        | 3802.84         | 951.13                     | 761.11 | 634.42 | 543.93 | 476.07 | 952.00                     | 761.00 | 634.00 | 544.00 | 476.00 |
| W-K <sub>6</sub> - <sup>1</sup> L <sub>3</sub> -A <sub>9</sub> -Nva-A <sub>9</sub> - <sup>1</sup> L <sub>3</sub> -K <sub>6</sub> | 11,13,15,17,19                      | 20/40/60/80/100                        | 3802.84         | 951.13                     | 761.11 | 634.42 | 543.93 | 476.07 | 952.00                     | 761.00 | 634.00 | 544.00 | 476.00 |
| <i>Xxx = Val</i>                                                                                                                 |                                     |                                        |                 |                            |        |        |        |        |                            |        |        |        |        |
| W-K <sub>6</sub> - <sup>1</sup> L <sub>3</sub> -A <sub>9</sub> -V-A <sub>9</sub> - <sup>1</sup> L <sub>3</sub> -K <sub>6</sub>   | 1,4,9                               | 25/50/100                              | 3800.83         | 950.63                     | 760.70 | 634.09 | 543.65 | 475.82 | 951.00                     | 761.00 | 634.00 | 544.00 | 476.00 |
| W-K <sub>6</sub> - <sup>1</sup> L <sub>3</sub> -A <sub>9</sub> -V-A <sub>9</sub> - <sup>1</sup> L <sub>3</sub> -K <sub>6</sub>   | 2,4,6,8                             | 25/50/75/100                           | 3801.83         | 950.88                     | 760.90 | 634.26 | 543.79 | 475.94 | 951.00                     | 761.00 | 635.00 | 544.00 | 476.00 |
| W-K <sub>6</sub> - <sup>1</sup> L <sub>3</sub> -A <sub>9</sub> -V-A <sub>9</sub> - <sup>1</sup> L <sub>3</sub> -K <sub>6</sub>   | 2,3,5,6,7                           | 20/40/60/80/100                        | 3802.84         | 951.13                     | 761.11 | 634.42 | 543.93 | 476.07 | 952.00                     | 761.00 | 634.00 | 544.00 | 476.00 |
| W-K <sub>6</sub> - <sup>1</sup> L <sub>3</sub> -A <sub>9</sub> -V-A <sub>9</sub> - <sup>1</sup> L <sub>3</sub> -K <sub>6</sub>   | 8,12,14,16,18                       | 20/40/60/80/100                        | 3802.84         | 951.13                     | 761.11 | 634.42 | 543.93 | 476.07 | 952.00                     | 761.00 | 634.00 | 544.00 | 476.00 |
| W-K <sub>6</sub> - <sup>1</sup> L <sub>3</sub> -A <sub>9</sub> -V-A <sub>9</sub> - <sup>1</sup> L <sub>3</sub> -K <sub>6</sub>   | 11,13,15,17,19                      | 20/40/60/80/100                        | 3802.84         | 951.13                     | 761.11 | 634.42 | 543.93 | 476.07 | 952.00                     | 761.00 | 634.00 | 544.00 | 476.00 |

#### **IV. CD ellipticities, which have corroborative value, are unsuited as primary tools for the assignment of helical propensities from host-guest mutants.**

##### **A. Experimental circular dichroism characterization of helix-coil peptide equilibria; variability of helical structure; structural-dependences of the helical circular dichroism ellipticity $[\theta]_{222,H,n,T}$**

For a typical peptide the proximity-coupled  $\pi \rightarrow \pi^*$  and  $n \rightarrow \pi^*$  electronic and magnetic transitions of its backbone amides define the major CD chromophores within the wavelength region of 185 to 250 nm. Mean values of  $\phi$  and  $\psi$  dihedral angles, which fall within Ramachandran-allowed regions, define the signs and intensities of these transitions,<sup>1</sup> and for peptides in solution, CD ellipticities thus provide a unique tool for conformational assignments. The distinctive signature of the  $\alpha$ -helical conformation is an intense positive ellipticity maximum near 290 nm, and a pair of intense negative ellipticity minima at 208 and 222 nm.

$$[\theta]_{222, \text{Exper}, n, T} = \text{FH} [\theta]_{222, H, n, T} + (1 - \text{FH}) [\theta]_{222, C, n, T} \quad \text{Y FH} [\theta]_{222, H, n, T} \quad (1)$$

$$[\theta]_{222, H, n, T} = [\theta]_{222, H, \infty, T} (1 - X/n) \quad 0 \leq X \leq 1.0 \quad (2)$$

With increasing temperature, a helical peptide in water that is unassociated and lacks stabilization from tertiary packing undergoes reversible helix-coil melting, characterized by a decrease in the mole fraction FH of its helical residues and a proportionate increase in the mole fraction (1 – FH) of residues that assume coil conformations. Given Equation (1) parameter values, one can to a good approximation characterize helix-coil melting from the experimental temperature dependence of the 222 nm molar per-residue ellipticity  $[\theta]_{222, \text{Exper}, n, T}$ , and the accuracy of this two-state model can be confirmed for a particular peptide by ellipticities at 203 nm, at which coil and helix values are equal.<sup>2</sup> *The model is confirmed if the T-dependent CD spectra share a 203 nm isodichroic point.*<sup>3</sup> At one or more fixed temperatures, Equation (1) is also universally used to assign FH changes induced by a series of guest residue substitutions within a host helical peptide. However the single reported 203 nm test of the validity of this use failed to yield consistent isodichroic behavior.<sup>4</sup>

For either FH calculation, accurate assignments for the helicity parameters are essential, and the major issue explored in this supplement section is their accuracy when applied to host-guest data. Although the  $[\theta]_{222, H, n, T}$  and  $[\theta]_{222, H, \infty, T}$  parameters resemble UV-vis spectroscopic extinction coefficients, they differ in two fundamental respects: their intensities reflect the local structural environment, and they are temperature-sensitive.<sup>3,5,6</sup>

The structural variability of the  $\alpha$ -helix itself accounts for much of this sensitivity. An  $\alpha$ -helical conformation is defined by a contiguous sequence of backbone C=O to H-N amide hydrogen bonds of the 3.6<sub>13</sub> type, and modeling as well as examples from the PDB show this structural condition to be met provided the average of sums of  $\alpha$ -carbon  $\phi$ ,  $\psi$  pairs within the sequence lies close to  $-105^\circ$ .<sup>7</sup> However, within this constraint,  $\phi$  ranges from  $-25$  to  $-95^\circ$ , with corresponding  $\psi$  values of  $-80$  to  $-10^\circ$ .<sup>7</sup> Molecular modeling of polyalanines reveals the Ramachandran helical region as an extended  $\phi$ ,  $\psi$  trough, with shallow local minima, that spans these  $\phi$ ,  $\psi$  ranges.<sup>8</sup> Moreover ab initio CD modeling shows that this  $\alpha$ -helical  $\phi$ -angle variation results in a substantial intensity change for  $[\theta]_{222,H}$ ,<sup>9</sup> and experimental data support this prediction. Mean values for  $[\theta]_{222,H,\infty,T}$  of PDB  $\alpha$ -helices, which have a mean  $\phi$  of  $-63^\circ$ ,<sup>10</sup> fall within the range,  $-37 \times 10^3$  to  $-44 \times 10^3$  deg cm<sup>2</sup> dm<sup>-1</sup>, also consistent with length extrapolations from alanine-rich heteropeptide CD data.<sup>6</sup> A different picture emerges from our NMR and CD studies of core regions of N- and C-capped, fully helical polyalanine cores.<sup>11</sup> Their  $\phi$  is  $-51 \pm 2^\circ$ , close to an average of values for the classic fiber-diffraction structure and the Pauling  $\alpha$ -helix, and their  $[\theta]_{222,H,\infty,T}$  is  $-(60.5 \pm 1.3) \times 10^3$  deg cm<sup>2</sup> dm<sup>-1</sup>, confirmed by low temperature CD spectra of a winter flounder protein with a 70 % Ala content).<sup>12</sup>

The 3<sub>10</sub> helix, frequently detected within short helical regions of PDB globular proteins, is more tightly helical than the  $\alpha$ , with  $\phi = -49^\circ$ ,  $\psi = -25^\circ$ ,<sup>13</sup> and novel ESR<sup>14</sup> and NMR<sup>15</sup> structural methods, applied to a range of test peptides, demonstrate hybrid 3<sub>10</sub>- $\alpha$  character that is most pronounced within end regions. Peptides with pure 3<sub>10</sub> structure are characterized by exceptionally weak intensities for  $[\theta]_{222,H}$ , although shorter wavelength CD maxima and minima have nearly normal intensities.<sup>16</sup> Doubt clearly compromises accuracy for FH values assigned from  $[\theta]_{222,Exper}$  values of peptides that, like these, assume hybrid 3<sub>10</sub>- $\alpha$  structures.

B. Evidence for significant perturbations of the intensity of  $[\theta]_{222,H}$ : The end-region correction of Equation (2). Plausible corrections in  $[\theta]_{222,H,\infty,T}$  from <sup>13</sup>C=O NMR chemical shift data of mutants **1** and  $[\theta]_{\lambda,Exper,n,T}$  data of mutants **2**; Tests of the validity of the two-state assumption of Equation (1) from  $[\theta]_{203}$  data. In the accompanying manuscript we report a set of temperature-dependent relative helical propensities  $w_{XXX}/w_{Ala}$  assigned from  $[\theta]_{222,Exper,n,T}$  data for a mutant series **2** and a second propensity set assigned from <sup>13</sup>C=O NMR chemical shifts for a mutant series **1**. Although statistical tests yield satisfactory correlations for this  $w_{XXX}/w_{Ala}$  pair, the magnitudes for many of the ellipticity-derived  $w_{XXX}/w_{Ala}$  are smaller than those derived from shifts. We now make the case that the likely

cause is a reduction in the intensity of  $[\theta]_{222,H,\infty,T}$ , caused by central (Ala  $\rightarrow$  Guest) replacements that perturb local helical structure.

A special problem potentially compromises accuracy for helical propensities derived from ellipticity data. For a sequence that contains  $n$  alanine residues and a single central guest, the fractional helicity FH is a global parameter that equals the average of  $n + 1$  site helicities  $FH_i$ . We have previously shown that as measures of helix-coil sequence equilibria, the FH and any of the  $FH_i$  are fully equivalent,<sup>17</sup> but practically speaking, the  $FH_i$  are much more versatile. From a full list of  $FH_i$  one can exclude the  $FH_i$  that correspond to sites most susceptible to spurious perturbations, and as shown in the main text, these include sites within end regions as well as sites locally N-terminal to the guest. For a given peptide, a single  $[\theta]_{222}$  is measurable, and it yields only one FH value.

A structure- and solvation-induced ellipticity perturbation is clearly embodied in the empirically characterized parameter  $X$  that appears in Equation (2), which is universally used to assign a length-dependence to  $[\theta]_{222,H,n,T}$  from the length-independent core ellipticity  $[\theta]_{222,H,\infty,T}$ . Since  $X$  invariably has a positive value, inspection of Equation (2) shows that a residue at or near an N- or C-terminus must contribute less to  $[\theta]_{222,H,n,T}$  than a core residue.<sup>18</sup>

We have clarified these issues experimentally.<sup>11</sup> For a tailored length series,  $10 \leq n \leq 23$ , of spaced, solubilized polyalanines with exceptional helicities, the  $^1\text{H}$  and  $^{13}\text{C}$  NMR chemical shifts of the helical backbone residues of the two sets of four N- and C-terminal residues are strongly site-dependent, but backbone shifts for the remaining  $(n - 8)$  core residues have fixed values, independent of site or length  $n$ , and their FH values<sup>19</sup> exceed 0.99.

$$[\theta]_{\lambda,H,n,T} = ([\theta]_{\lambda,H,\text{core,Molar}} + [\theta]_{\lambda,H,\text{caps,Molar}})/n = ([\theta]_{\lambda,H,\infty,T}(n - k) + [\theta]_{\lambda,H,\infty,T}(k - X))/n \quad (2a)$$

$$[\theta]_{222,H,\text{caps},T}/[\theta]_{222,H,\infty,T} = (k - X)/k \quad (3)$$

It is conceptually useful to define a new parameter  $k$  as the number of non-core residues within a helical peptide, incorporating it into Equation (2a). (Inspection shows this to be a full equivalent of Equation (2).) For our polyalanine series,  $k$  equals 8. For each series member, the intensity of  $[\theta]_{\lambda,\text{Exper},n,T}$  was measured and expressed in molar units. Their length regressions proved to be strictly linear at all wavelengths, within measurement error, the resulting  $\lambda$ -dependent slopes equal the core per-residue molar ellipticities  $[\theta]_{\lambda,H,\infty,T}$ , and multiplication by the core length  $(n - k)$  yields molar ellipticities that correspond to the first term of Equation (2a). The second term is  $[\theta]_{\lambda,H,\infty,T}(k - X)$ , which equals  $[\theta]_{\lambda,H,\text{caps,Molar}} = k [\theta]_{\lambda,H,\text{caps}}$ . This is defined experimentally as the intercepts of the



displacements of the squares correspond to  $[\theta]_{222}$  values modeled from propensities assigned from  $^{13}\text{C}=\text{O}$  chemical shift data, as described in the accompanying text, using the host-derived value of  $[\theta]_{222,\text{H},\infty,T}$ . The dotted black lines show modeled values of  $[\theta]_{222}$  calculated from  $[\theta]_{222,\text{H},\infty,T}$ , attenuated by successive factors 0.97, 0.95, 0.90, or 0.85. Inspection shows that with the exception of  $\text{Xxx} = \text{Gly}$ , all ellipticity data can be modeled attenuations within this plausible range. The glycine result deserves comment. Previously reported relative helical propensities for glycine span a fifteen-fold range, and assignments from ellipticity data cluster at the lower end.<sup>22</sup> The Ramachandran permissiveness of a Gly residue strongly suggests that, within a peptide sequence, glycine may be uniquely tolerant of  $3_{10}$  structure, implying that the appropriate values of  $[\theta]_{222,\text{H},\infty,T}$  for helicity data of glycine mutants must be lower than normal, with a corresponding underestimation of the glycine propensity.<sup>23</sup>

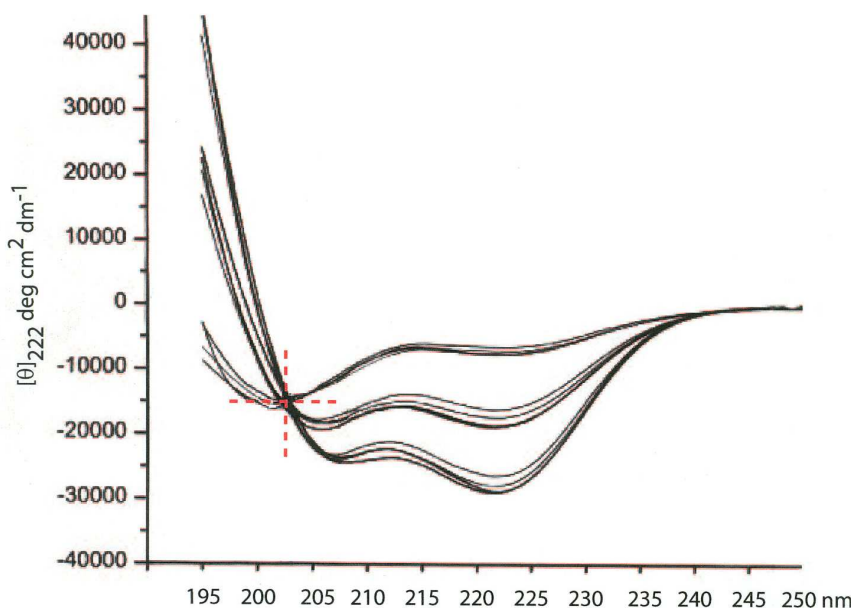

**Figure 2** CD spectra, 190 to 250 nm, at 2, 25, and 60 °C, for the host peptide  $^t\text{L-Ala}_{19}\text{-}^t\text{L}$  and for mutants  $^t\text{L-Ala}_9\text{XxxAla}_9\text{-}^t\text{L}$ ,  $\text{Xxx} \equiv \text{Nle}$  (norleucine),  $\text{Nva}$  (norvaline), and  $\text{Abu}$  ( $\alpha$ -aminobutyric acid). A well-defined isodichroic point is evident at 202.5 °C with  $[\theta]_{202.5,\text{Exper}} = (-15 \pm 1) \times 10^3 \text{ deg cm}^2 \text{ dm}^{-1}$ , consistent with values reported by Holtzer and Holtzer.<sup>2</sup> The two error assignments lie within precision limits.

An independent test for accuracy examines mutant ellipticities measured at 203 nm. The guest-dependent, corrected values  $[\theta]_{222,\text{H},\infty,T}$  that appear in Figure 1 were assigned under the assumption that a wrong choice for this parameter is wholly responsible for the deviations that appear within

Figure 5 of the main text. If this assumption is correct, corresponding guest-dependent deviations should appear if one compares mutant values for  $[\theta]_{203}$ . (The data points of Figure 1 show only the deviant values; no deviations were detected for mutants derived from the non-natural residues Nva and Nle, which bear straight-chain alkyl side chains.) Figure 2 shows superimposed CD spectra measured at 2, 25, and 60 °C for the host peptide  ${}^t\text{L-Ala}_9\text{XxxAla}_9\text{-}^t\text{L}$ ,  $\text{Xxx} \equiv \text{Ala}$  for a homologous series of three mutants containing site 10 Abu,<sup>24</sup> Nva, or Nle residues. The twelve CD spectra of Figure 2 exhibit a well-defined isodichroic point at 202.5 nm, with an ellipticity intensity of  $-15 \times 10^3 \text{ deg cm}^2 \text{ dm}^{-1}$ , fully consistent with an authoritative literature assignment.<sup>2</sup>

A different picture results if includes in Figure 2 the 2, 25, and 60 °C CD spectra of mutants derived from guests Val, Ile, Met, and Phe. The limits of curve intersections broaden to a wavelength range of 201 to 205 nm, and at 202.5 nm, the error in the ellipticity increases to  $\pm 3 \times 10^3 \text{ deg cm}^2 \text{ dm}^{-1}$ , corresponding to a  $\pm 20 \%$  relative error, which lies outside data precision limits. A plot of 2, 25, and 60 °C CD spectra of mutants derived from guests Gln, Asn, Ser, Met, Thr, Tyr, Asp, and Glu yields curve intersections that expand to a wavelength range of 200 to 209 nm, and at 202.5 nm, the error in the ellipticity increased to  $\pm 5 \times 10^3 \text{ deg cm}^2 \text{ dm}^{-1}$ , corresponding to a  $\pm 33 \%$  relative error. These findings definitively validate our conclusion that guest-induced ellipticity perturbations are large enough to explain the accuracies seen in Figure 1. For a majority of the natural amino acid residues, we have proved that CD measurements are unsuitable tools for assigning primary values for host-guest derived helical propensities.

Useful supporting information is also provided by comparisons with double mutant sets as seen in the following table.

**Table 10.** Correlations Between Paired  $w_{\text{XXX}}/w_{\text{Ala}}$  Sets. XXX = A, L, M, I, Q, V, F, Y, S, N, T, G

Set A:  $w_{\text{XXX}}/w_{\text{Ala}}$  Assigned from  $^{13}\text{C}=\text{O}$  Chemical Shifts at Site 14 of Mutants **1**. Set B:  $w_{\text{XXX}}/w_{\text{Ala}}$

Assigned from  $[\theta]_{222}$  Values of Mutants **2**. Set C:  $w_{\text{XXX}}/w_{\text{Ala}}$  Assigned from  $[\theta]_{222}$  Values of Mutant

**2** analogs that contain Two XXX guests at Sites 10 & 11.

| T, °C | Paired Sets | Slope | Intercept | Fit (SD) | CC   | Mean $\Delta$ % |
|-------|-------------|-------|-----------|----------|------|-----------------|
| 2     | A - B       | 1.01  | - 0.15    | 0.08     | 0.95 | + 41            |
| 2     | A - C       | 0.99  | - 0.11    | 0.06     | 0.97 | + 30            |
| 2     | C - B       | 0.95  | + 0.05    | 0.03     | 0.99 | + 11            |
| 25    | A - B       | 0.96  | - 0.09    | 0.06     | 0.97 | + 25            |
| 25    | A - C       | 0.83  | + 0.01    | 0.07     | 0.95 | + 11            |
| 25    | C - B       | 0.87  | + 0.08    | 0.03     | 0.99 | + 14            |
| 60    | A - B       | 0.99  | + 0.06    | 0.08     | 0.89 | - 8             |
| 60    | A - C       | 0.81  | + 0.18    | 0.04     | 0.96 | - 8             |
| 60    | C - B       | 0.64  | + 0.27    | 0.07     | 0.84 | + 0.6           |



## **V. References**

---

- (1) Yang, J. T.; Wu, C.-S. C.; Martinez, H. M. *Methods Enzymol.* **1986**, *130*, 208—269.
- (2) Holtzer, M. E.; Holtzer, A. *Biopolymers* **1992**, *32*, 1675—1677.
- (3) Wallimann, P., Kennedy, R. J., Miller, J. S., Shalongo, W., Kemp, D. S. *J. Am. Chem. Soc.* **2002**, *125*, 1203—1220.
- (4) Lyu, P. C.; Liff, M. I.; Marky, L. A.; Kallenbach, N. R. *Science* **1990**, *250*, 669—673.
- (5) Job, G. E.; Kennedy, R. S.; Heitmann, B.; Miller, J. S.; Walker, S. M.; Kemp, D. S. *J. Am. Chem. Soc.* **2006**, *128*, 8227—8233.
- (6) Luo, P.; Baldwin, *Biochemistry* **1997**, *36*, 8422—8421.
- (7) Besley, N. A.; Hirst, J. D. *J. Am. Chem. Soc.* **1999**, *121*, 9636—9644.
- (8) Mahadevan, J.; Lee, K.-H.; Kuczera, K. *J. Phys. Chem. B* **2001**, *105*, 1863—1976.
- (9) Woody, R. W.; Sreerama, N. *J. Chem. Phys.* **1999**, *111*, 2844—2845. Manning, M. C.; Woody, R. W. *Biopolymers* **1991**, *31*, 569—586.
- (10) Barlow, D. J.; Thornton, J. M. *J. Mol. Biol.* **1988**, *201*, 601—619.
- (11) Heitmann, B.; Job, G. E.; Kennedy, R. S.; Miller, J. S.; Walker, S. M.; Kemp, D. S. *J. Am. Chem. Soc.* **2005**, *127*, 1690—1704.
- (12) Marshall, C. B., Chakrabarty, A., Davies, P. L. *J. Biol. Chem.* **2005**, *280*, 17920—17929.
- (13) Creighton, T. R. “Proteins: Structure and Molecular Properties”, W. H. Freeman and Co., New York, 1983, p 171.
- (14) Bolin, K. A.; Millhauser, G. L. *Acc. Chem. Res.* **1999**, *32*, 1027—1033.
- (15) (a) Millhauser, G. L.; Stenland, C. J.; Hansen, P.; Bolin, K. A.; van de Ven, F. J. M. *J. Mol. Biol.* **1997**, *267*, 963—974; (b) Long, H. W.; Tycko, R. *J. Am. Chem. Soc.* **1998**, *120*, 7039—7048.
- (16) Toniolo, C.; Polese, A.; Formaggio, F.; Crisma, M.; Kamphuis, J.; *J. Am. Chem. Soc.* **1996**, *118*, 2744—2745.
- (17) Nasr, K. A.; Schubert, C. R.; Török, M.; Kennedy, R. J.; Kemp, D. S. *Biopolymers* **2009**, *91*, 311—320.
- (18) A rigorous distinction between core and ends is justified by the rigid cylindrical structure of a peptide helix. Since for an unaggregated homopeptide sequence of sufficient length, energy perturbations are plausibly all local, and a core must exist in which all residues have the same structure, helix-coil energetics, and per-residue ellipticities. This convergence defines  $[\theta]_{\lambda, H, \infty, T}$ .
- (19) Assigned from NH  $\rightarrow$  ND kinetics at 2 °C.<sup>11</sup>

---

(20) Walker, S. M.; Kemp, D. S. unpublished observations.

(21) For the cap-stabilized polyalanines of reference 11,  $X = 2.5$ ; for the peptides **1**, which contain bulky, hydrophobic <sup>1</sup>L spacing regions,  $X = 6$  to  $7$ , and  $X = 4$  to  $5$  for corresponding peptides containing alanine and D-alanine spacers, Kennedy, R. S.; Miller, J. S.; Walker, S. M.; Kemp, D. *S. J. Am. Chem. Soc.* **2005**, *127*, 16961—16968.

(22) Luo, P.; Baldwin, R. L.; *Proc. Natl. Acad. Sci. USA* **1999**, *96*, 4930—4935.

(23) Lee, J.; Kemp, D. S. unpublished observations.

(24) The required synthetic facilities and personnel were no longer available to us for synthesis of a mutant **1** that contains <sup>13</sup>C=O reporters and a site 10 Abu =  $\alpha$ -aminobutyric acid guest.
